# Supplementary material for: Takotsubo Syndrome after Pacemaker Implantation: A Systematic Review
Source: PubMed Central journal article supplement (PMC11270462; doi:10.31083/j.rcm2312401), 2022-12-12
Supplement: 2153-8174-23-12-401-s1.pdf [file 2153-8174-23-12-401-s1.pdf]

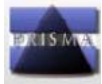

# PRISMA 2020 Checklist

| Section and Topic             | Item # | Checklist item                                                                                                                                                                                                                                                                                                                                                                          | Location where item is reported |
|-------------------------------|--------|-----------------------------------------------------------------------------------------------------------------------------------------------------------------------------------------------------------------------------------------------------------------------------------------------------------------------------------------------------------------------------------------|---------------------------------|
| <b>TITLE</b>                  |        |                                                                                                                                                                                                                                                                                                                                                                                         |                                 |
| Title                         | 1      | Optimal timing of revascularization in patients with STEMI and multivessel disease: a systematic review and meta-analysis.                                                                                                                                                                                                                                                              | Title Page                      |
| <b>ABSTRACT</b>               |        |                                                                                                                                                                                                                                                                                                                                                                                         |                                 |
| Abstract                      | 2      | See the PRISMA 2020 for Abstracts checklist.                                                                                                                                                                                                                                                                                                                                            |                                 |
| <b>INTRODUCTION</b>           |        |                                                                                                                                                                                                                                                                                                                                                                                         |                                 |
| Rationale                     | 3      | Was to provide a comprehensive overview of the current knowledge about pacemaker-induced TTS                                                                                                                                                                                                                                                                                            | Introduction                    |
| Objectives                    | 4      | To provide a comprehensive overview or pacemaker-induced TTS.                                                                                                                                                                                                                                                                                                                           | Introduction                    |
| <b>METHODS</b>                |        |                                                                                                                                                                                                                                                                                                                                                                                         |                                 |
| Eligibility criteria          | 5      | Criteria for inclusion were (i) original data; (ii) presence of apical ballooning, (iii) exclusion of obstructive CAD (iv) other cardiomyopathies ruled out or unlikely; and (v) occurrence shortly following pacemaker implantation                                                                                                                                                    | Methods                         |
| Information sources           | 6      | Scientific literature was searched for on the following public databases: PubMed ( <a href="https://pubmed.ncbi.nlm.nih.gov/">https://pubmed.ncbi.nlm.nih.gov/</a> ) and Google Scholar.                                                                                                                                                                                                | Methods                         |
| Search strategy               | 7      | key-words for the search: (("takotsubo cardiomyopathy" [MeSH Terms]) OR (takotsubo syndrome [MeSH Terms] OR (takotsubo pacemaker [Title])) AND (pacemaker[Text Word]) AND (English[Language]))                                                                                                                                                                                          | Methods                         |
| Selection process             | 8      | Two reviewers (AS, IL) independently screened search records to identify eligible trials. Divergencies were resolved though discussion until consensus was reached. Manuscripts were selected if they fulfilled all the pre-defined inclusion criteria reported.                                                                                                                        | Methods                         |
| Data collection process       | 9      | Data extraction was performed by two independent reviewers (AS, IL), with divergences resolved by consensus. Baseline characteristics of the patients included were extracted to an excel worksheet, including age, gender, cardiovascular risk factors, timing of TTS onset respect to pacemaker implantation, clinical presentation and symptoms, clinical outcome and recovery time. | Methods                         |
| Data items                    | 10a    | The outcomes for which data were sought were: clinical outcome and recovery time.                                                                                                                                                                                                                                                                                                       | Methods                         |
|                               | 10b    | All other variables for which data were sought were: age, gender, cardiovascular risk factors, timing of TTS onset respect to pacemaker implantation, clinical presentation and symptoms                                                                                                                                                                                                | Methods                         |
| Study risk of bias assessment | 11     | NA                                                                                                                                                                                                                                                                                                                                                                                      |                                 |
| Effect measures               | 12     | NA                                                                                                                                                                                                                                                                                                                                                                                      |                                 |
| Synthesis methods             | 13a    | NA                                                                                                                                                                                                                                                                                                                                                                                      |                                 |
|                               | 13b    | NA                                                                                                                                                                                                                                                                                                                                                                                      |                                 |
|                               | 13c    | The methods used to tabulate or visually display results of the studies and syntheses have been tables.                                                                                                                                                                                                                                                                                 |                                 |
|                               | 13d    | NA                                                                                                                                                                                                                                                                                                                                                                                      |                                 |
|                               | 13e    | NA                                                                                                                                                                                                                                                                                                                                                                                      |                                 |
|                               | 13f    | NA                                                                                                                                                                                                                                                                                                                                                                                      |                                 |
| Reporting bias assessment     | 14     | NA                                                                                                                                                                                                                                                                                                                                                                                      |                                 |
| Certainty assessment          | 15     | The Grading of Recommendations Assessment, Development and Evaluation (GRADE) approach was used to assess the certainty in the body of evidence for all outcomes.                                                                                                                                                                                                                       | Methods                         |
| <b>RESULTS</b>                |        |                                                                                                                                                                                                                                                                                                                                                                                         |                                 |



# PRISMA 2020 Checklist

| Section and Topic             | Item # | Checklist item                                                                                                                                                                                                                                                                     | Location where item is reported                    |
|-------------------------------|--------|------------------------------------------------------------------------------------------------------------------------------------------------------------------------------------------------------------------------------------------------------------------------------------|----------------------------------------------------|
| Study selection               | 16a    | A flow diagram was used to describe the results of the search and selection process, from the number of records identified in the search to the number of studies included in the systematic review.                                                                               | Figure 1                                           |
|                               | 16b    | Some studies might appear to meet the inclusion criteria, but they were excluded, because they did not report the clinical outcomes related to this topic.                                                                                                                         | Figure 1                                           |
| Study characteristics         | 17     | 18 manuscripts were case reports, with 28 patients.                                                                                                                                                                                                                                | Results                                            |
| Risk of bias in studies       | 18     | NA.                                                                                                                                                                                                                                                                                |                                                    |
| Results of individual studies | 19     | NA                                                                                                                                                                                                                                                                                 |                                                    |
| Results of syntheses          | 20a    | NA                                                                                                                                                                                                                                                                                 |                                                    |
|                               | 20b    | NA                                                                                                                                                                                                                                                                                 |                                                    |
|                               | 20c    | NA                                                                                                                                                                                                                                                                                 |                                                    |
|                               | 20d    | NA                                                                                                                                                                                                                                                                                 |                                                    |
| Reporting biases              | 21     | NA                                                                                                                                                                                                                                                                                 |                                                    |
| Certainty of evidence         | 22     | The Grading of Recommendations Assessment, Development and Evaluation (GRADE) approach was used to assess the certainty in the body of evidence for every outcome.                                                                                                                 | Results                                            |
| <b>DISCUSSION</b>             |        |                                                                                                                                                                                                                                                                                    |                                                    |
| Discussion                    | 23a    | Our analysis documented similar clinical outcomes with either single-stage immediate complete revascularization and delayed staged complete revascularization, especially when DES are used.                                                                                       | Conclusions                                        |
|                               | 23b    | The study protocol and the PRISMA flowchart are included in the manuscript text.                                                                                                                                                                                                   | Main text and supplements                          |
|                               | 23c    | Only case reports and case-series were found in published literature.                                                                                                                                                                                                              | Limitations                                        |
|                               | 23d    | awareness about the potential to develop TTS after pacemaker implantation should prompt careful clinical monitoring, with daily ECG monitoring and at least one echocardiographic examination prior to patients' discharge to allow early diagnosis and minimize the clinical risk | Abstract (page 2) and Conclusions (page 7prospero) |
| <b>OTHER INFORMATION</b>      |        |                                                                                                                                                                                                                                                                                    |                                                    |
| Registration and protocol     | 24a    | PROSPERO does not accept scoping reviews, literature reviews or mapping reviews. This should not stop you from submitting your full protocol or completed review for publication in a journal.                                                                                     | Methods                                            |
|                               | 24b    | Protocol details are available in the main text and manuscript supplements                                                                                                                                                                                                         |                                                    |
|                               | 24c    | NA                                                                                                                                                                                                                                                                                 |                                                    |
| Support                       | 25     | No financial or non-financial support for the review was given.                                                                                                                                                                                                                    |                                                    |
| Competing interests           | 26     | The of review authors have no competing interests.                                                                                                                                                                                                                                 |                                                    |
| Availability of               | 27     | The template of the Prisma Flow Diagram can be found at <a href="https://prisma-statement.org/prismastatement/flowdiagram.aspx">https://prisma-statement.org/prismastatement/flowdiagram.aspx</a> .                                                                                |                                                    |

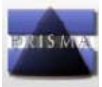

## PRISMA 2020 Checklist

| Section and Topic              | Item # | Checklist item | Location where item is reported |
|--------------------------------|--------|----------------|---------------------------------|
| data, code and other materials |        |                |                                 |

*From:* Page MJ, McKenzie JE, Bossuyt PM, Boutron I, Hoffmann TC, Mulrow CD, et al. The PRISMA 2020 statement: an updated guideline for reporting systematic reviews. *BMJ* 2021;372:n71. doi: 10.1136/bmj.n71

For more information, visit: <http://www.prisma-statement.org/>
